# Supplementary material for: Novel achiral four-ring bent-shaped nematic liquid crystals with trifluoromethyl and methyl substituents in the central molecular core: an unusually large Kerr constant in blue phase III of nematic-chiral dopant mixture
Source: Royal Society of Chemistry journal article supplement (doi:10.1039/c7tc01186e), 2017-01-01
Supplement: c7tc01186e1.pdf [file c7tc01186e1.pdf]

## Electronic Supplementary Information

### Novel achiral four-ring bent-shaped nematic liquid crystals with trifluoromethyl and methyl substituents in central molecular core: Unusual large Kerr constant in blue phase III of nematic-chiral dopant mixture.

R. K.Khan<sup>1</sup>, S.Turlapati<sup>2</sup>, N. V. S. Rao<sup>2</sup>, R. Pratibha<sup>3</sup>, W. Drzewinski<sup>4</sup>, R. Dabrowski<sup>4</sup> and S. Ghosh<sup>1\*</sup>.

<sup>1</sup>Department of Physics, University of Calcutta, 92 Acharya Prafulla Chandra Road, Kolkata 700 009, India, email: sharmisthaghos@gmail.com;

<sup>2</sup>Chemistry Department, Assam University, Silchar 788011, India.

<sup>3</sup>Raman Research Institute, C. V. Raman Avenue, Sadashivanagar, Bangalore 560 080, India.

<sup>4</sup>Institute of Chemistry, Military University of Technology, 00-908 Warsaw, Poland

#### Procedure for the Synthesis of the compounds:

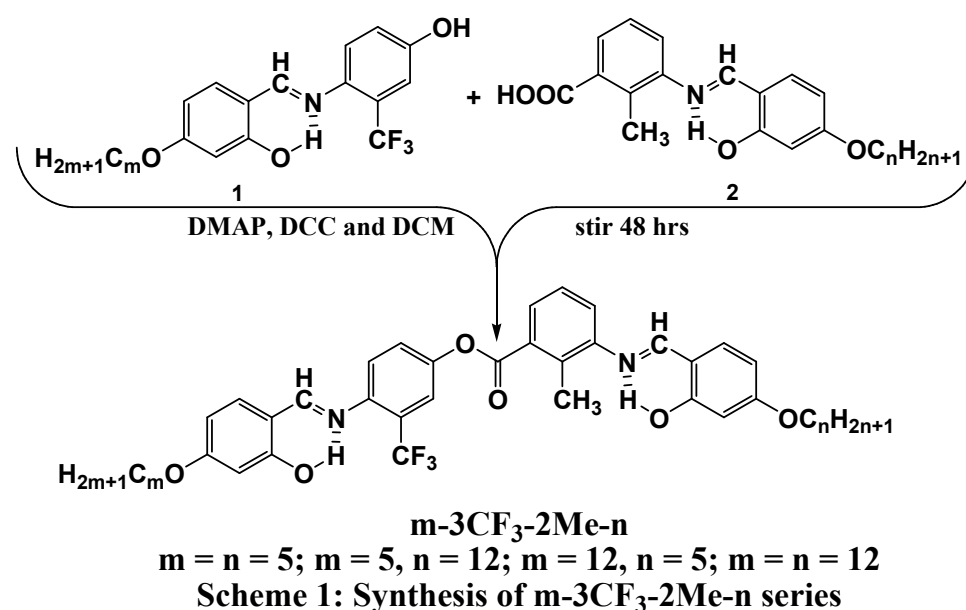

**4-[N-(4'-(n-pentyloxy-2-hydroxybenzylidene)amino] 3-trifluoromethylphenyl-4yl 3-[N-(4'-(n-pentyloxy-2-hydroxybenzylidene)amino]-2-methylbenzoate, 5-3CF<sub>3</sub>-2M-5:**

3-[N-(4'-n-pentyloxy-2-hydroxybenzylidene)amino]-2-methylbenzoic acid (0.68g; 2 mmol) was dissolved in dichloromethane, stirred on a magnetic stirrer and a catalytic amount of N,N'-dimethylaminopyridine (DMAP) was added to the solution. To the stirred reaction mixture a solution 4-[N-(4-n-pentyloxy-2-hydroxybenzylidene)amino]-3-trifluoromethyl phenol (0.73g, 2 mmol) was slowly added. To the resulting solution an equimolar quantity of dicyclohexylcarbodiimide (DCC) (0.412g, 2 mmol) was added and stirred for 48 hours. After the completion of stirring, the dicyclohexylurea thus formed in the reaction mixture was

filtered off. Evaporation of the solvent gave the crude product which was then recrystallized several times from ethanol to obtain the pure product 4-[N-(4'-(n-pentyloxy-2-hydroxybenzylidene)amino) 3-trifluoromethylphenyl-4yl 3-[N-(4'-n-pentyloxy-2-hydroxybenzylidene)amino]-2-methylbenzoate, **5-3CF<sub>3</sub>-2M-5**, as yellow solid. Yield: 0.96g, (70%); IR  $\nu_{\max}$  in  $\text{cm}^{-1}$ : 1619 ( $\nu_{\text{CH=N}}$ , imine); 1759 ( $\nu_{\text{C=O}}$ , ester), 3070( $\nu_{\text{O-H}}$ , H-bonded);  $^1\text{H}$  NMR ( $\text{CDCl}_3$ , 400 MHz): 13.46 (s, 1H, -OH), 12.94 (s, 1H, -OH), 8.52 (s, 1H, -CH=N-), 8.45 (s, 1H, -CH=N-), 8.00 (dd, 1H, J = 1.2 Hz, J = 7.6 Hz, ArH), 7.58 (d, 1H, J = 2.4 Hz, ArH), 7.49 (dd, 1H, J = 2.4 Hz, J = 8.4 Hz, ArH), 7.39 (t, 1H, J = 8.0 Hz, ArH), 7.31-7.27 (4H, ArH), 6.52-6.50 (4H, ArH), 4.01 (t, 4H, J = 6.8 Hz, -OCH<sub>2</sub>-), 2.67 (s, 3H, Ar-CH<sub>3</sub>), 1.83-1.36 (m, 12H, -(CH<sub>2</sub>)<sub>6</sub>-), 0.94 (t, 6H, J = 7.6 Hz, 2x -CH<sub>3</sub>),  $^{19}\text{F}$  NMR 60.93. Elemental Analysis calculated for C<sub>39</sub>H<sub>41</sub>F<sub>3</sub>N<sub>2</sub>O<sub>6</sub>: C, 67.81; H, 5.98 %, N = 4.06%; Found: C, 67.18; H, 5.89%, N = 4.00%.

Using the same procedure as described above, the other compounds of **n-3CF<sub>3</sub>-2Me-m** series (**n = 5, m =12**), (**n = 12, m = 5**) and (**n = m =12**), with varying the number of carbon atoms (n) and (m) in the terminal alkyloxy chains using starting compounds in appropriate molar ratios were synthesized.

**4-[N-(4'-(n-pentyloxy-2-hydroxybenzylidene)amino) 3-trifluoromethylphenyl-4yl 3-[N-(4'-n-dodecyloxy-2-hydroxybenzylidene)amino]-2-methylbenzoate, 5-3CF<sub>3</sub>-2M-12:**

Yield: 1.19g, (76%); IR  $\nu_{\max}$  in  $\text{cm}^{-1}$ : 1622 ( $\nu_{\text{CH=N}}$ , imine); 1762 ( $\nu_{\text{C=O}}$ , ester), 3105( $\nu_{\text{O-H}}$ , H-bonded);  $^1\text{H}$  NMR ( $\text{CDCl}_3$ , 400 MHz): 13.48 (s, 1H, -OH), 12.96 (s, 1H, -OH), 8.54 (s, 1H, -CH=N-), 8.47 (s, 1H, -CH=N-), 8.00 (dd, 1H, J = 1.2 Hz, J = 7.6 Hz, ArH), 7.58 (d, 1H, J = 2.4 Hz, ArH), 7.49 (dd, 1H, J = 2.4 Hz, J = 8.4 Hz, ArH), 7.39 (t, 1H, J = 8.0 Hz, ArH), 7.31-7.27 (4H, ArH), 6.52-6.50 (4H, ArH), 4.03 (t, 4H, J = 6.8 Hz, -OCH<sub>2</sub>-), 2.69 (s, 3H, Ar-CH<sub>3</sub>), 1.84-1.29 (m, 26H, -(CH<sub>2</sub>)<sub>13</sub>-), 0.96 (t, 3H, J = 7.6 Hz, -CH<sub>3</sub>), 0.90 (t, 3H, J = 7.6 Hz, -CH<sub>3</sub>). Elemental Analysis calculated for C<sub>46</sub>H<sub>55</sub>F<sub>3</sub>N<sub>2</sub>O<sub>6</sub>: C, 70.03; H, 7.03 %, N = 3.55%; Found: C, 69.37; H, 6.99 %, N = 3.55%.

**4-[N-(4'-(n-dodecyloxy-2-hydroxybenzylidene)amino) 3-trifluoromethylphenyl-4yl 3-[N-(4'-n-pentyloxy-2-hydroxybenzylidene)amino]-2-methylbenzoate, 12-3CF<sub>3</sub>-2M-5:**

Yield: 1.22g, (78%); IR  $\nu_{\max}$  in  $\text{cm}^{-1}$ : 1628 ( $\nu_{\text{CH=N}}$ , imine); 1749 ( $\nu_{\text{C=O}}$ , ester), 3103( $\nu_{\text{O-H}}$ , H-bonded);  $^1\text{H}$  NMR ( $\text{CDCl}_3$ , 400 MHz): 13.46 (s, 1H, -OH), 12.94 (s, 1H, -OH), 8.52 (s, 1H, -CH=N-), 8.45 (s, 1H, -CH=N-), 8.00 (dd, 1H, J = 1.2 Hz, J = 7.6 Hz, ArH), 7.58 (d, 1H, J = 2.4 Hz, ArH), 7.49 (dd, 1H, J = 2.4 Hz, J = 8.4 Hz, ArH), 7.39 (t, 1H, J = 8.0 Hz, ArH), 7.31-7.27 (4H, ArH), 6.52-6.50 (4H, ArH), 4.02 (t, 4H, J = 6.8 Hz, -OCH<sub>2</sub>-), 2.67 (s, 3H, Ar-CH<sub>3</sub>), 1.84-1.27 (m, 26H, -(CH<sub>2</sub>)<sub>13</sub>-), 0.94 (t, 3H, J = 7.2 Hz, -CH<sub>3</sub>), 0.88 (t, 3H, J = 6.8

Hz, -CH<sub>3</sub>). Elemental Analysis calculated for C<sub>46</sub>H<sub>55</sub>F<sub>3</sub>N<sub>2</sub>O<sub>6</sub>: C, 70.03; H, 7.03 %, N = 3.55%; Found: C, 69.44; H, 6.88; N = 3.55%.

**4-[N-(4'-(n-dodecyloxy-2-hydroxybenzylidene)amino) 3-trifluoromethylphenyl-4yl 3-[N-(4'-(n-dodecyloxy-2-hydroxybenzylidene)amino]-2-methylbenzoate, 12-3CF<sub>3</sub>-2M-12:**

Yield: 1.31g, (74%); IR  $\nu_{\max}$  in cm<sup>-1</sup>: 1622 ( $\nu_{\text{CH=N}}$ , imine); 1761 ( $\nu_{\text{C=O}}$ , ester), 3114( $\nu_{\text{O-H}}$ , H-bonded); <sup>1</sup>H NMR (CDCl<sub>3</sub>, 400 MHz): 13.46 (s, 1H, -OH), 12.94 (s, 1H, -OH), 8.52 (s, 1H, -CH=N-), 8.45 (s, 1H, -CH=N-), 8.00 (dd, 1H, J = 1.2 Hz, J = 7.6 Hz, ArH), 7.58 (d, 1H, J = 2.4 Hz, ArH), 7.49 (dd, 1H, J = 2.4 Hz, J = 8.4 Hz, ArH), 7.39 (t, 1H, J = 8.0 Hz, ArH), 7.31-7.27 (4H, ArH), 6.52-6.50 (4H, ArH), 4.01 (t, 4H, J = 6.8 Hz, -OCH<sub>2</sub>-), 2.67 (s, 3H, Ar-CH<sub>3</sub>), 1.83-1.27 (m, 40H, -(CH<sub>2</sub>)<sub>2</sub>-), 0.88 (t, 6H, J = 6.8 Hz, 2 x -CH<sub>3</sub>). Elemental Analysis calculated for C<sub>53</sub>H<sub>69</sub>F<sub>3</sub>N<sub>2</sub>O<sub>6</sub>: C, 71.76; H, 7.84 %, N = 3.16; Found: C, 71.01; H, 7.45 %, N = 3.15%.

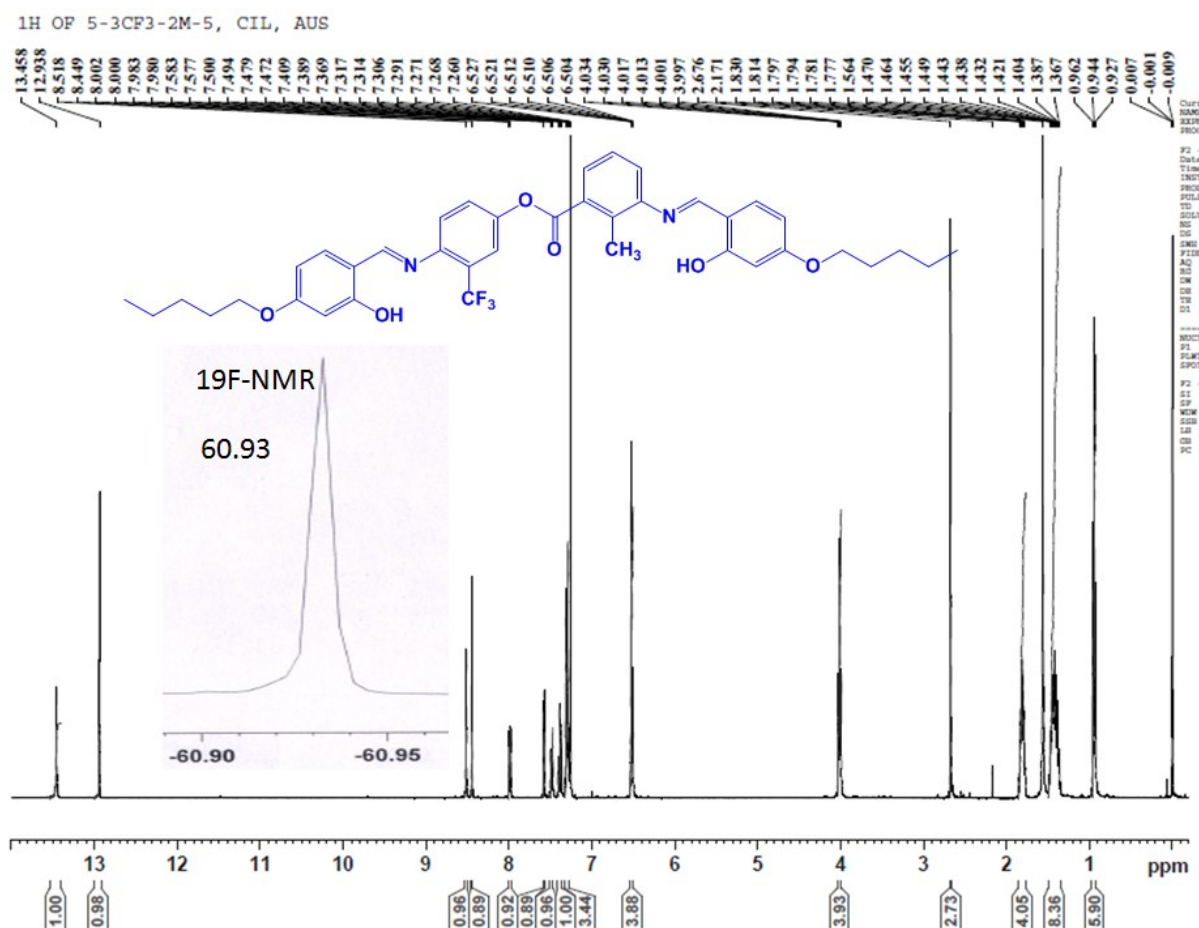

Figure 1a: <sup>1</sup>H-NMR and <sup>19</sup>F-NMR spectra of representative compound **5-3CF<sub>3</sub>-2M-5**

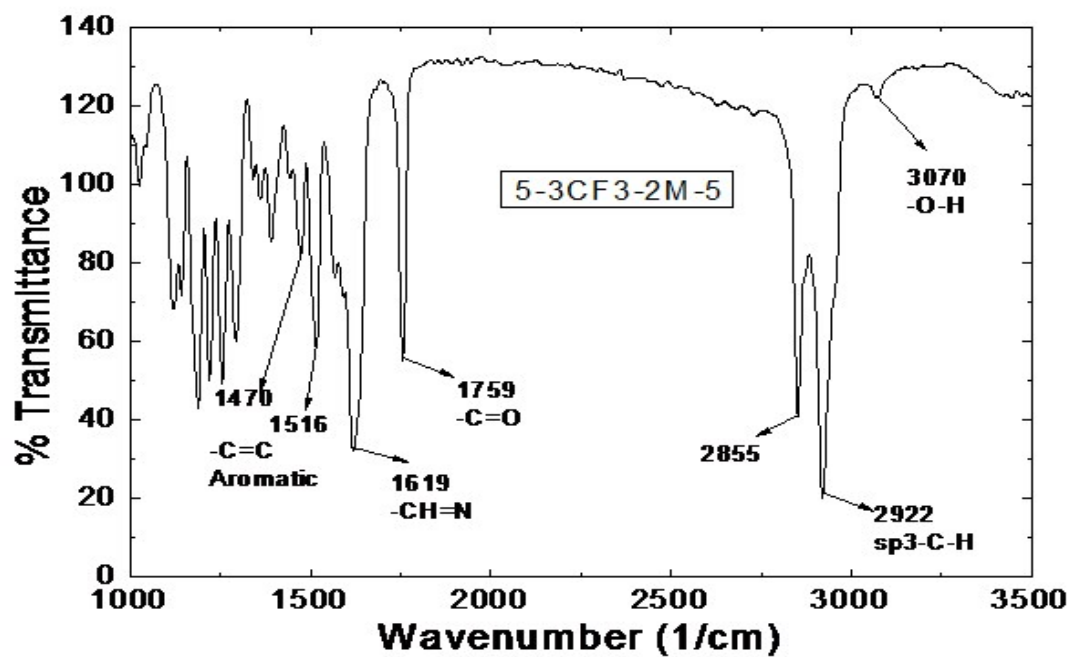

Figure 1b: FT-IR spectra of 5-3CF<sub>3</sub>-2M-5

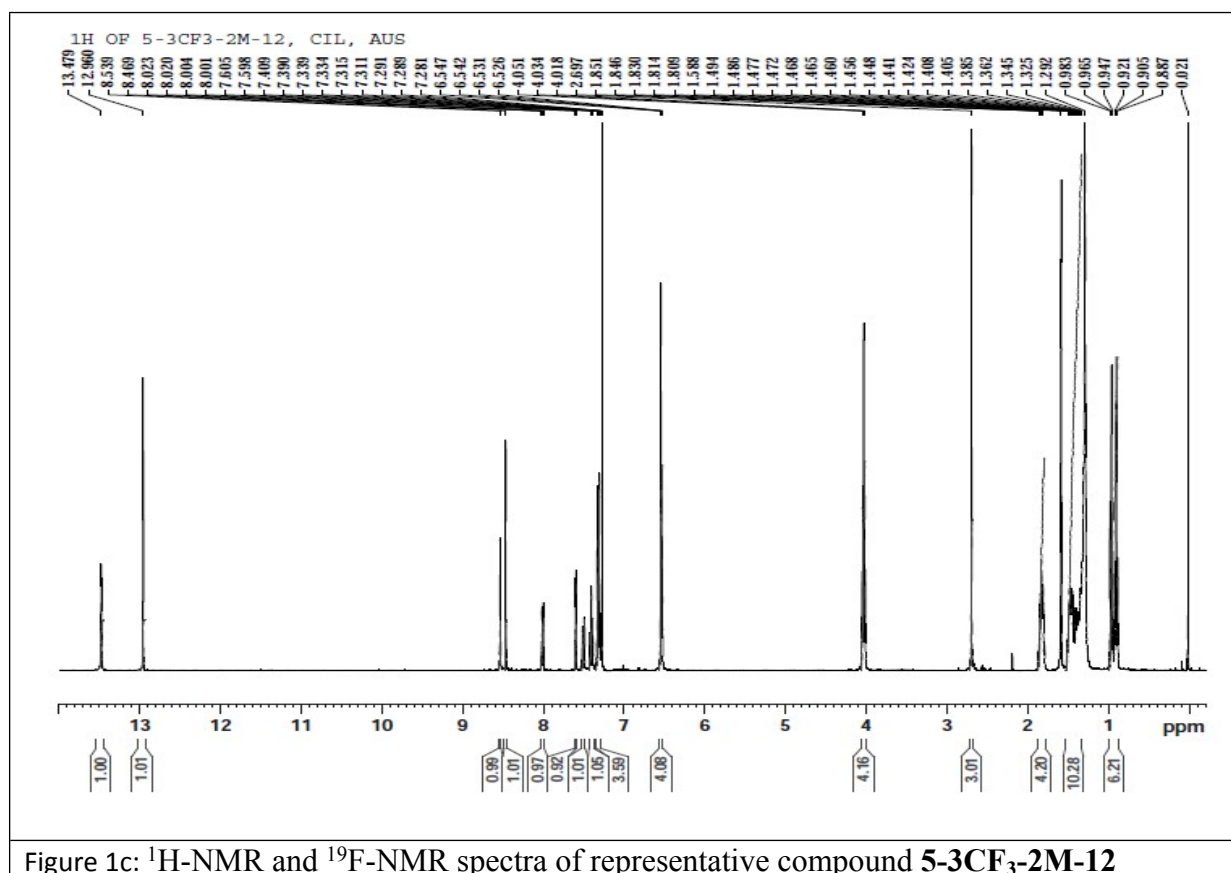

Figure 1c: <sup>1</sup>H-NMR and <sup>19</sup>F-NMR spectra of representative compound 5-3CF<sub>3</sub>-2M-12

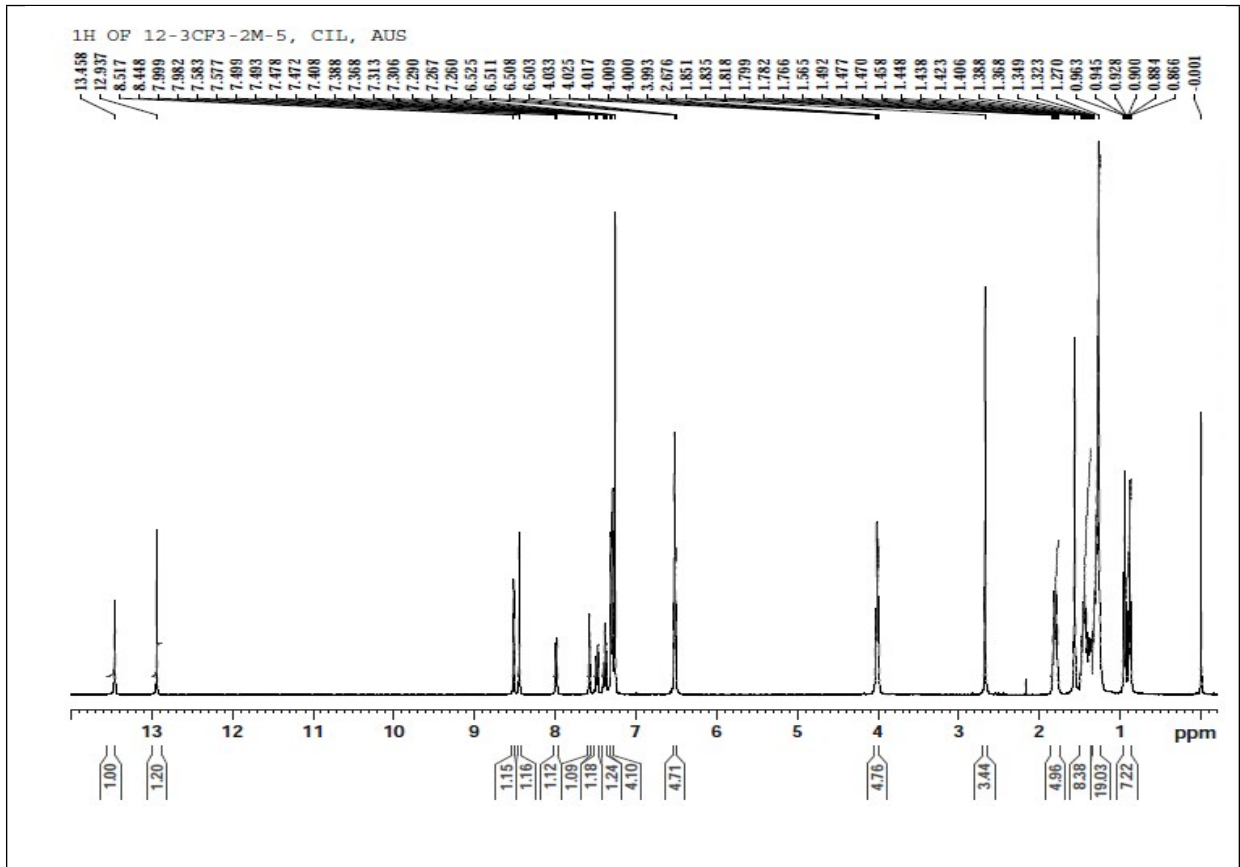

Figure 1d:  $^1\text{H}$ -NMR spectra of representative compound 12-3CF<sub>3</sub>-2M-5

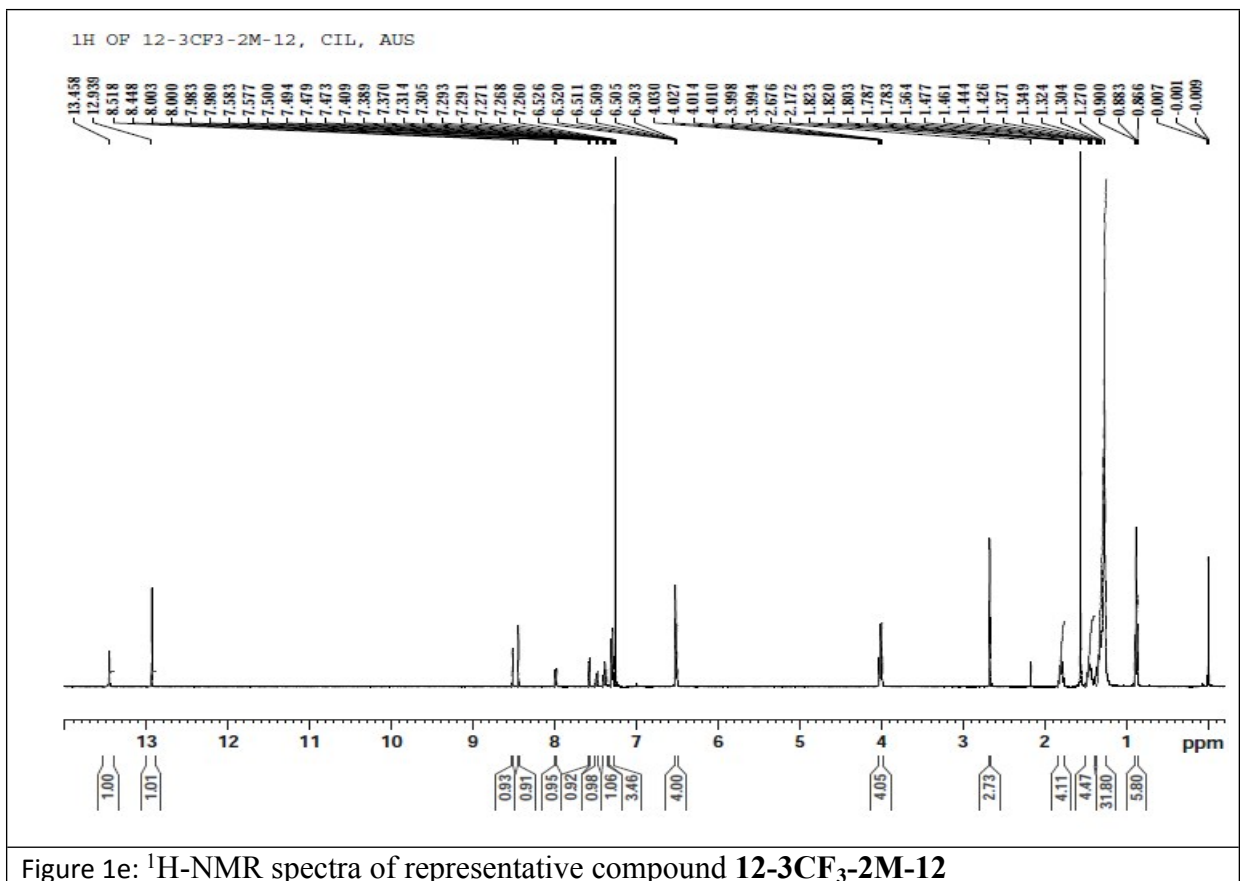

Figure 1e:  $^1\text{H}$ -NMR spectra of representative compound 12-3CF<sub>3</sub>-2M-12

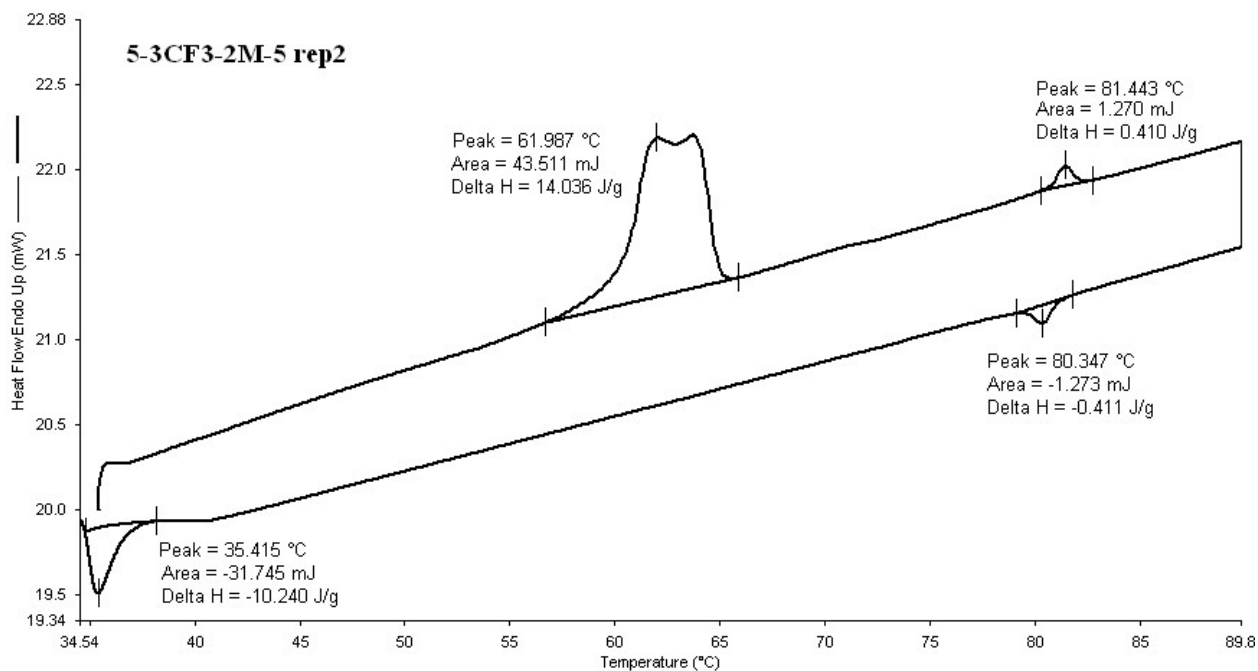

**Figure 1a:** Differential scanning calorimetry thermogram of of compound **5-3CF<sub>3</sub>-2M-5** in the second heating and cooling at 5°C/min.

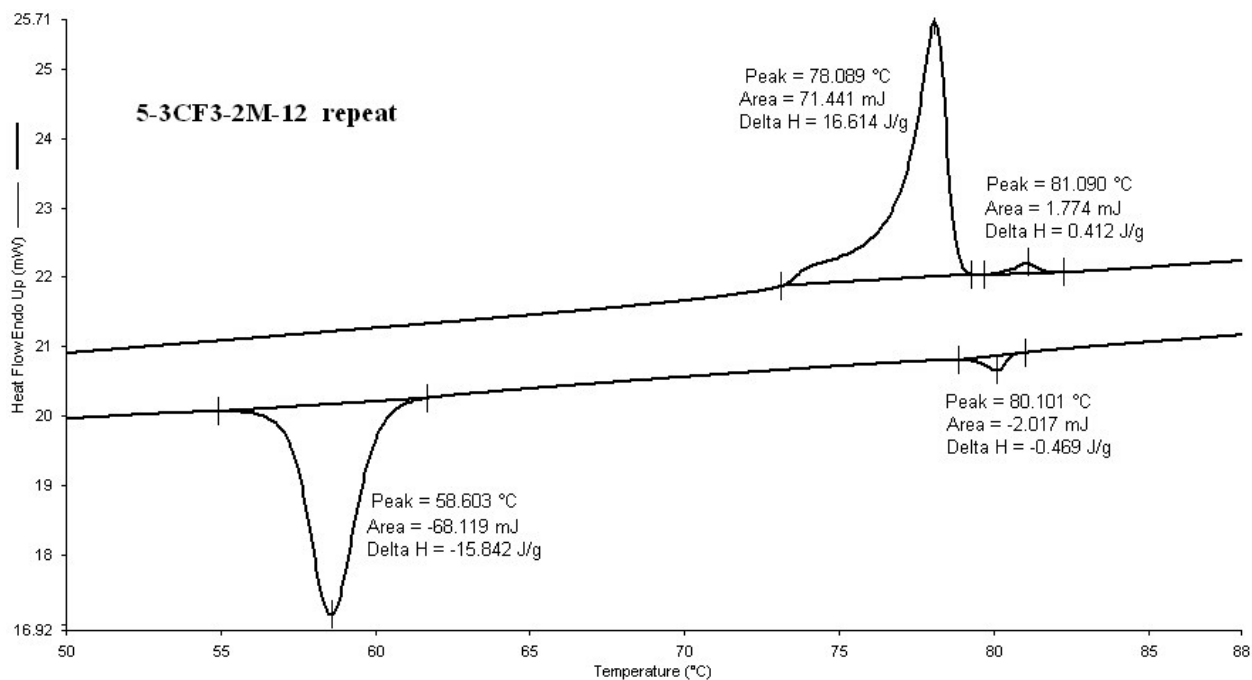

**Figure 1b:** Differential scanning calorimetry thermogram of of compound **5-3CF<sub>3</sub>-2M-12** in the second heating and cooling at 5°C/min.

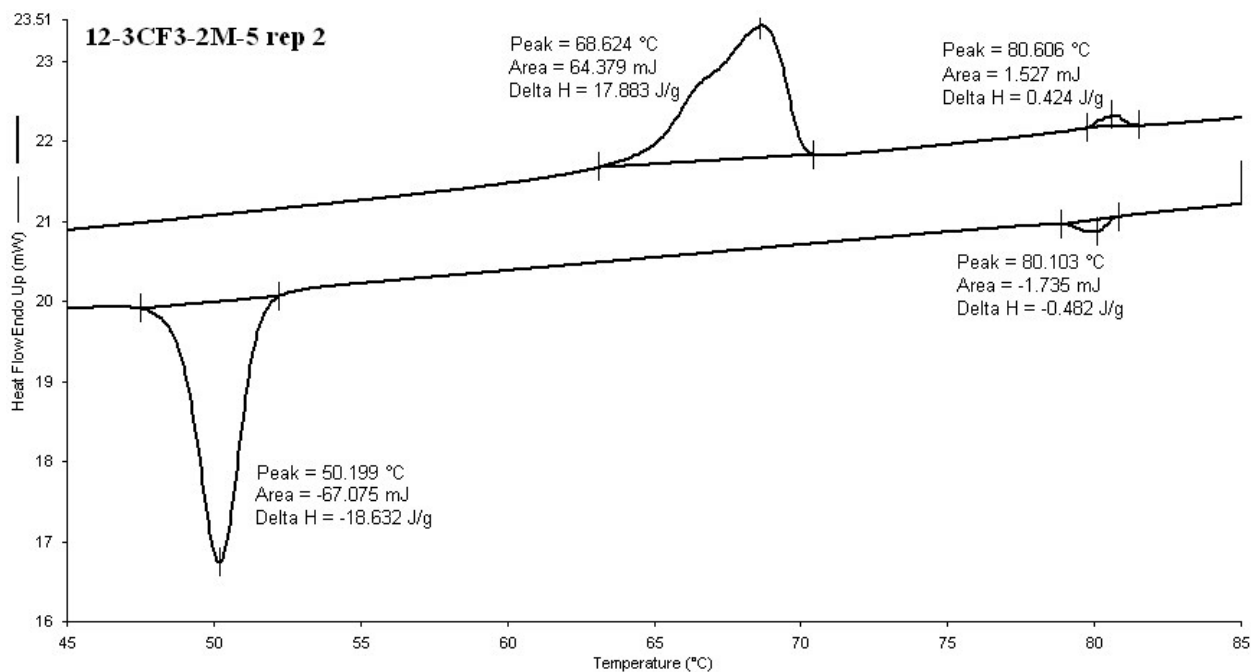

**Figure 1c:** Differential scanning calorimetry thermogram of compound **12-3CF<sub>3</sub>-2M-5** in the second heating and cooling at 5°C/min.

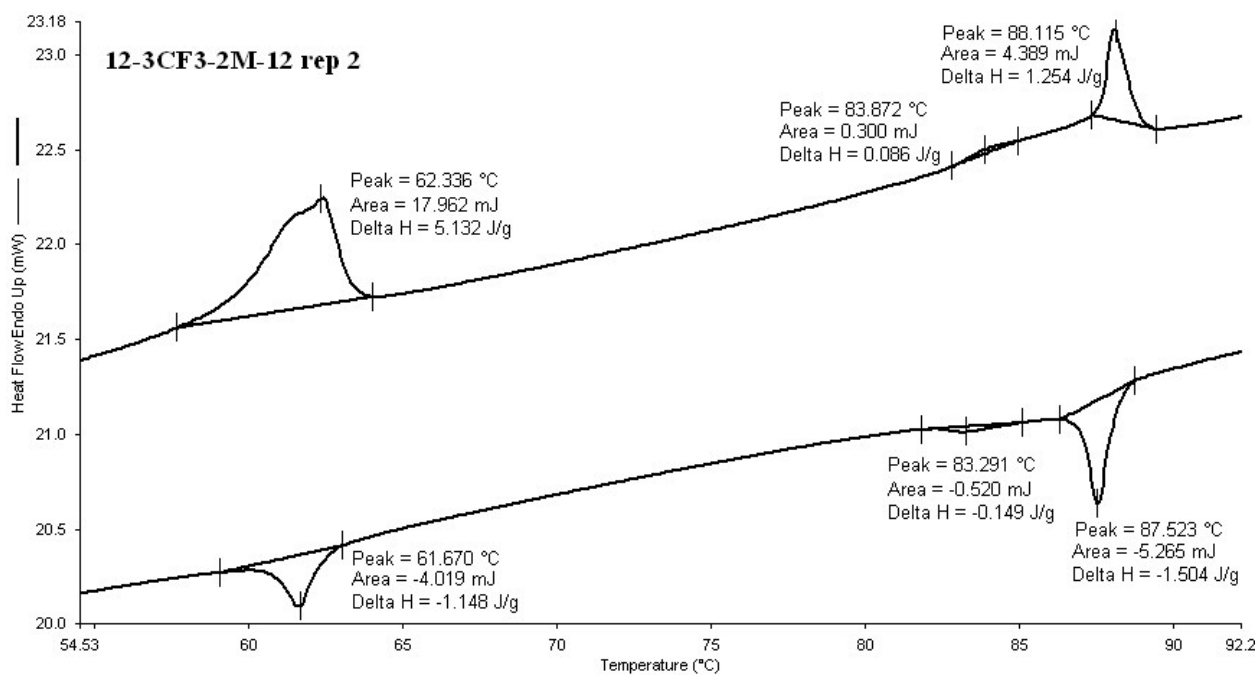

**Figure 1d:** Differential scanning calorimetry thermogram of of compound **12-3CF<sub>3</sub>-2M-12** in the second heating and cooling at 5°C/min.

## 2. Polarizing Optical micrographs of BPIII:

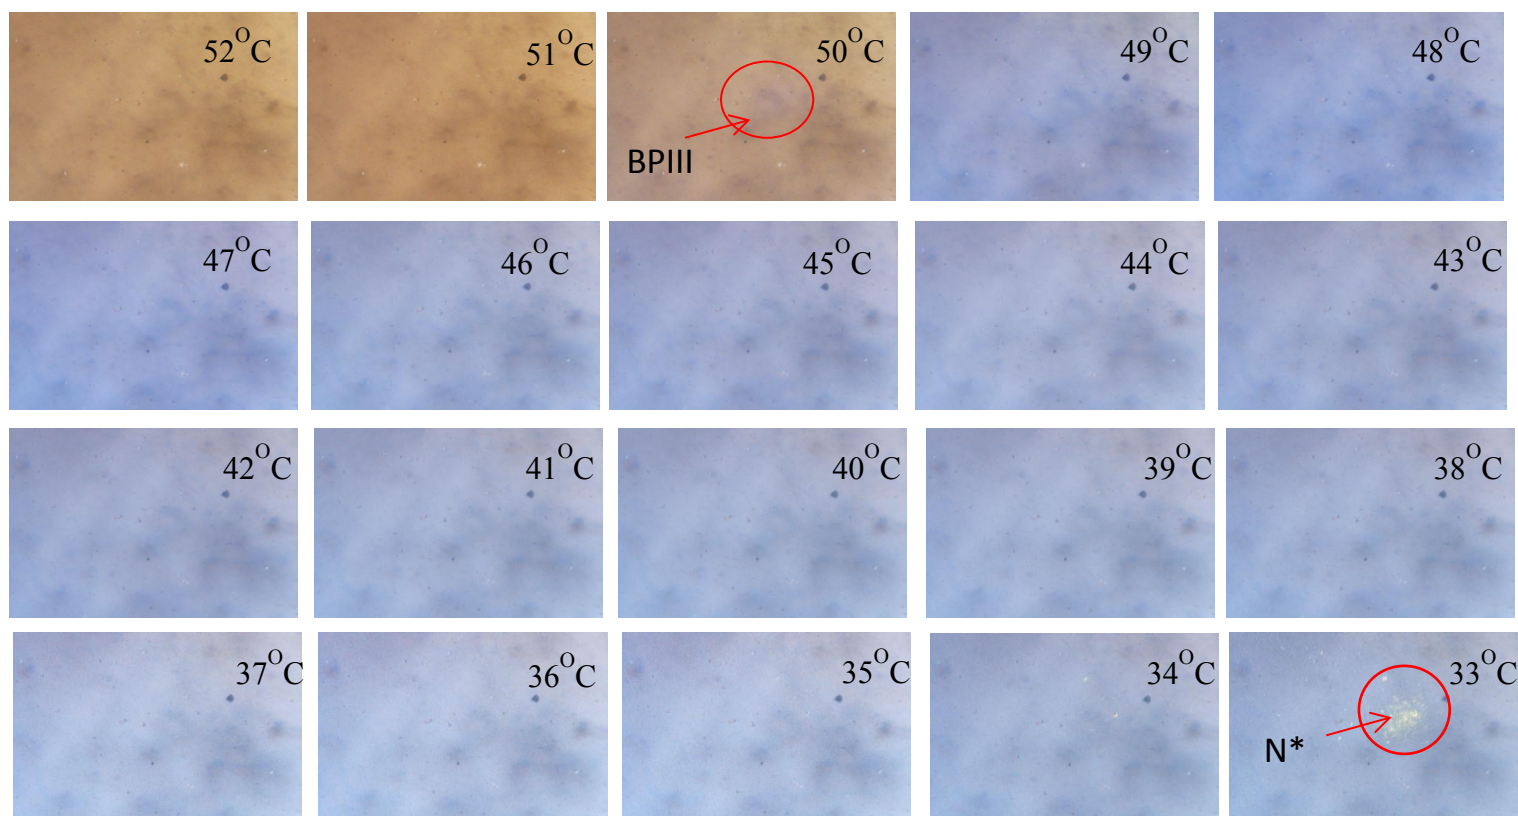

**Figure 2a: POM images exhibiting Iso-BPIII-N\* transition in a planar cell of thickness 4 $\mu$ m for the mixture 5-3CF3-2M-5 + 30% S811**

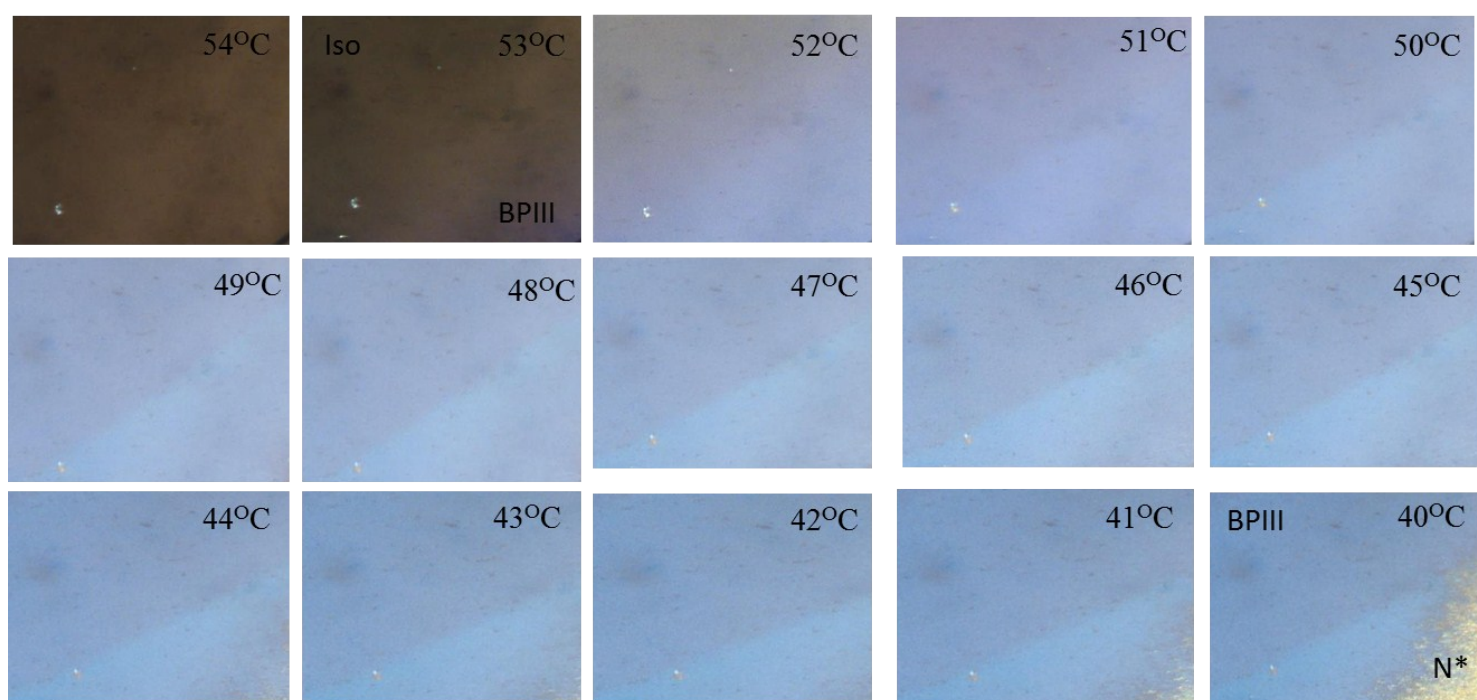



**Figure 2b:** POM images exhibiting Iso-BPIII-N\* transition in a planar cell of thickness  $4\mu\text{m}$  for the mixture 5-3CF3-2M-12 + 30% S811.
